# Supplementary material for: Piezoelectric MoS2 with expanded interlayers: a flexible anode for a “zero” interfacial quasi-solid-state ammonium-ion asymmetric supercapacitor
Source: Royal Society of Chemistry journal article supplement (doi:10.1039/d4ta04691a), 2024-01-01
Supplement: d4ta04691a1.pdf [file d4ta04691a1.pdf]

## Electronic Supplementary Information

### Experimental section

#### Materials.

Ammonium chloride ( $\text{NH}_4\text{Cl}$ ), ammonium molybdate tetrahydrate ( $(\text{NH}_4)_6\text{Mo}_7\text{O}_{24}\cdot 4\text{H}_2\text{O}$ ), thiourea ( $\text{CH}_4\text{N}_2\text{S}$ ), and poly(vinyl alcohol) ( $M_w \sim 67000$ ), were purchased from Aladdin Ltd. (Shanghai, China). Carbon cloth (CC) was obtained from Titan Technology Co., Ltd. All the chemicals were used as received without further purification. The deionized water ( $18.25 \text{ M}\Omega/\text{cm}$ ) used in all experiments was prepared by passing water through an ultra-pure purification system.

#### Synthesis of $\text{MoS}_2/\text{CC}$ , $\text{T-MoS}_2/\text{CC}$ , and $\text{Exp-MoS}_2/\text{CC}$ .

The  $\text{Exp-MoS}_2/\text{CC}$  was prepared through a reported solvothermal method.<sup>1</sup> Specifically, 0.2 g  $(\text{NH}_4)_6\text{Mo}_7\text{O}_{24}\cdot 4\text{H}_2\text{O}$  (the Mo source) and 0.3 g  $\text{CH}_4\text{N}_2\text{S}$  (the S source) were firstly dissolved in a mixture of water and ethanol (2:3) with a total volume of 40 mL under vigorous stirring. Then the above solution together with the pre-treated CC was transferred into an autoclave and heated at  $200^\circ\text{C}$  for 20 h. After cooling to room temperature, the product grown on CC was taken out, washed, and finally dried at  $60^\circ\text{C}$  in a vacuum oven.  $\text{MoS}_2/\text{CC}$  was prepared by the same method but only used water as a solvent.  $\text{T-MoS}_2/\text{CC}$  was prepared through an ethanol post-treatment with  $\text{MoS}_2/\text{CC}$ .

#### Synthesis of $\text{MnO}_2/\text{CC}$ .

First, 0.32 g of  $\text{KMnO}_4$ , and 1 mL of concentrated  $\text{HCl}$  were added to 80 mL of deionized water and stirred vigorously for 30 min to obtain a homogeneous solution. Then, the mixed solution and the CC were transferred into a Teflon-lined autoclave (100 mL) and underwent heating treatment at  $85^\circ\text{C}$  for 0.5 h.

#### Characterizations.

X-ray diffraction (XRD) patterns were obtained from a Shimadzu XRD-7000 diffractometer with  $\text{Cu K}\alpha$  radiation (40 kV, 30 mA). Scanning electron microscopy (SEM, ZISS 300) and transmission electron microscopy (TEM, JEM-F200, JEOL Ltd.)

were carried out to reveal the morphology information of samples. X-ray photoelectron spectroscopy (XPS) measurements were performed on an ESCALABMK II X-ray photoelectron spectrometer using Mg as the exciting source. In-situ Raman spectroscopy was recorded on the Lab RAM HR Evolution confocal microscope with 532 nm laser.

### **Electrochemical measurements.**

Electrochemical tests were carried out by cyclic voltammetry (CV), galvanostatic charge-discharge (GCD), and electrochemical impedance spectroscopy (EIS) using a CHI660b electrochemical workstation. The cycling durability was examined on a CT2001A LAND tester. The performance of the samples was examined in a conventional three-electrode setup using the carbon rod counter electrode, Ag/AgCl reference electrode, Exp-MoS<sub>2</sub>/CC working electrode, and 2.0 M NH<sub>4</sub>Cl aqueous electrolyte. The areal capacitances ( $C$ , mF cm<sup>-2</sup>) were calculated based on the GCD curves according to the following equation (1):

$$C = It/SV \quad (1)$$

where  $I/S$  is the current density (mA cm<sup>-2</sup>) and  $t$  is the discharge time (s).  $V$  is the potential window (V).

### **Fabrication of I-ASC and S-ASC.**

I-ASC was fabricated with Exp-MoS<sub>2</sub>/CC (anode), MnO<sub>2</sub>/CC (cathode), and PVA/NH<sub>4</sub>Cl through in situ polymerization to achieve integrated structure. S-ASC was fabricated by the traditional method with a sandwich-like structure. The areal energy densities ( $E$ , mWh cm<sup>-2</sup>) and power densities ( $P$ , mW cm<sup>-2</sup>) were calculated from equations (2) and (3):

$$E = C(\Delta V)^2/(2 \times 3.6) \quad (2)$$

$$P = 3600E/\Delta t \quad (3)$$

where  $\Delta V$  is the discharge voltage range (V) and  $\Delta t$  is the discharge time (s).

### **Computational details**

The COMSOL Multiphysics software was employed to simulate the intrinsic

piezoelectric field from 1T MoS<sub>2</sub>. The simplified model of the 1T MoS<sub>2</sub> nanosheet was set to 50 nm × 20 nm × 40 nm (length × width × height) with the specific parameters of density: 4.8 g cm<sup>-3</sup>, dielectric constant:  $\epsilon_r = 11.8$ , Young modulus: 265 Gpa.<sup>2</sup> The deformation ratio of the NH<sub>4</sub><sup>+</sup> intercalation was  $\approx 13.1\%$ , which was based on the estimation results of the in situ XRD spectra.

#### **DFT calculation details.**

All spin-polarized computations were performed under the framework of density functional theory (DFT). Perdew-Burke-Ernzerhof (PBE) functional among a generalized gradient approximation (GGA) was introduced to describe the exchange and correlation effect of electron. The projector augmented wave (PAW) method was employed to describe the electron-ion interaction. The kinetic energy cutoff for plane wave was set to 400 eV. The Brillouin zone was sampled by 3×3×1 grid for structural relaxation and 9×9×1 grid for density of states calculation. CI-NEB method combined with dimer method was employed to search the transition states of the diffusion process. The energy criterion was set to 10<sup>-5</sup> eV and force criterion was set to 0.02 eV/Å for structure relaxation and 0.1 eV for transition state computation. DFT-D3 method was employed for the correction of vdWs force. Pristine 2H-MoS<sub>2</sub> and 1T-MoS<sub>2</sub> were modeled by 4×4×1 supercell containing two layers and the ammonium-intercalation 1T-MoS<sub>2</sub> was constructed by adding three ammonium ions between double-layer 1T-MoS<sub>2</sub>.

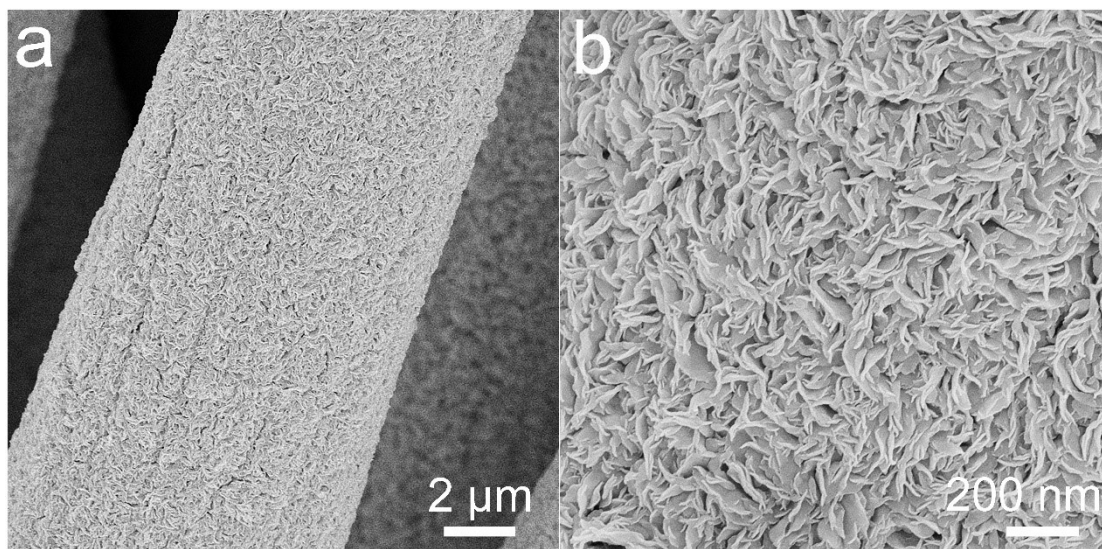

**Figure S1.** (a) Low- and (b) high-magnification SEM images of Exp-MoS<sub>2</sub>/CC.

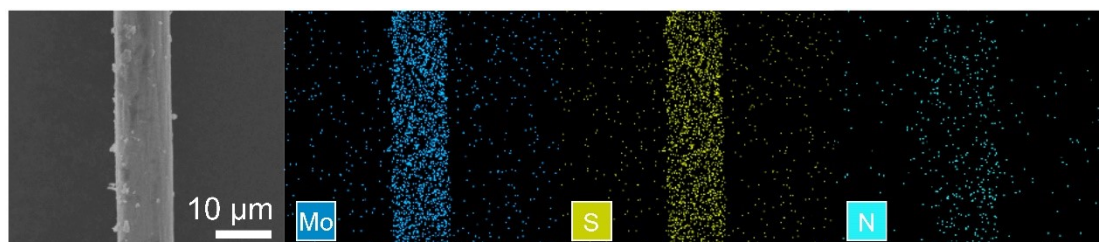

**Figure S2.** SEM and energy-dispersive X-ray elemental mapping images of Exp-MoS<sub>2</sub>/CC.

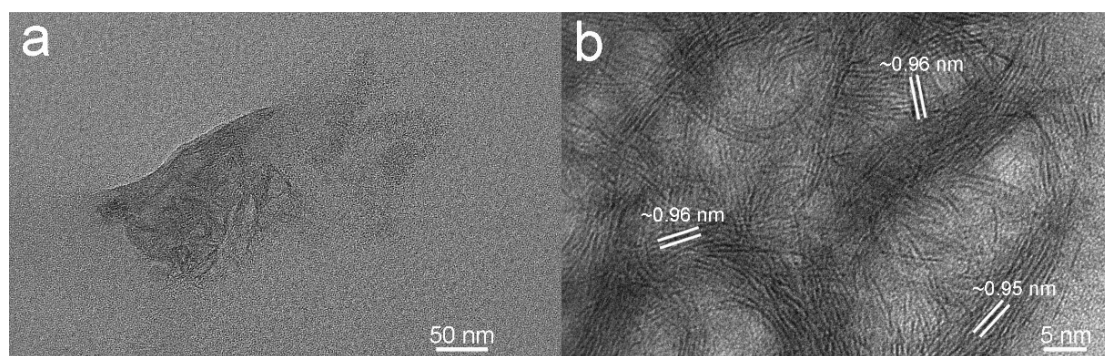

**Figure S3.** (a) TEM and (b) HRTEM images of Exp-MoS<sub>2</sub>.

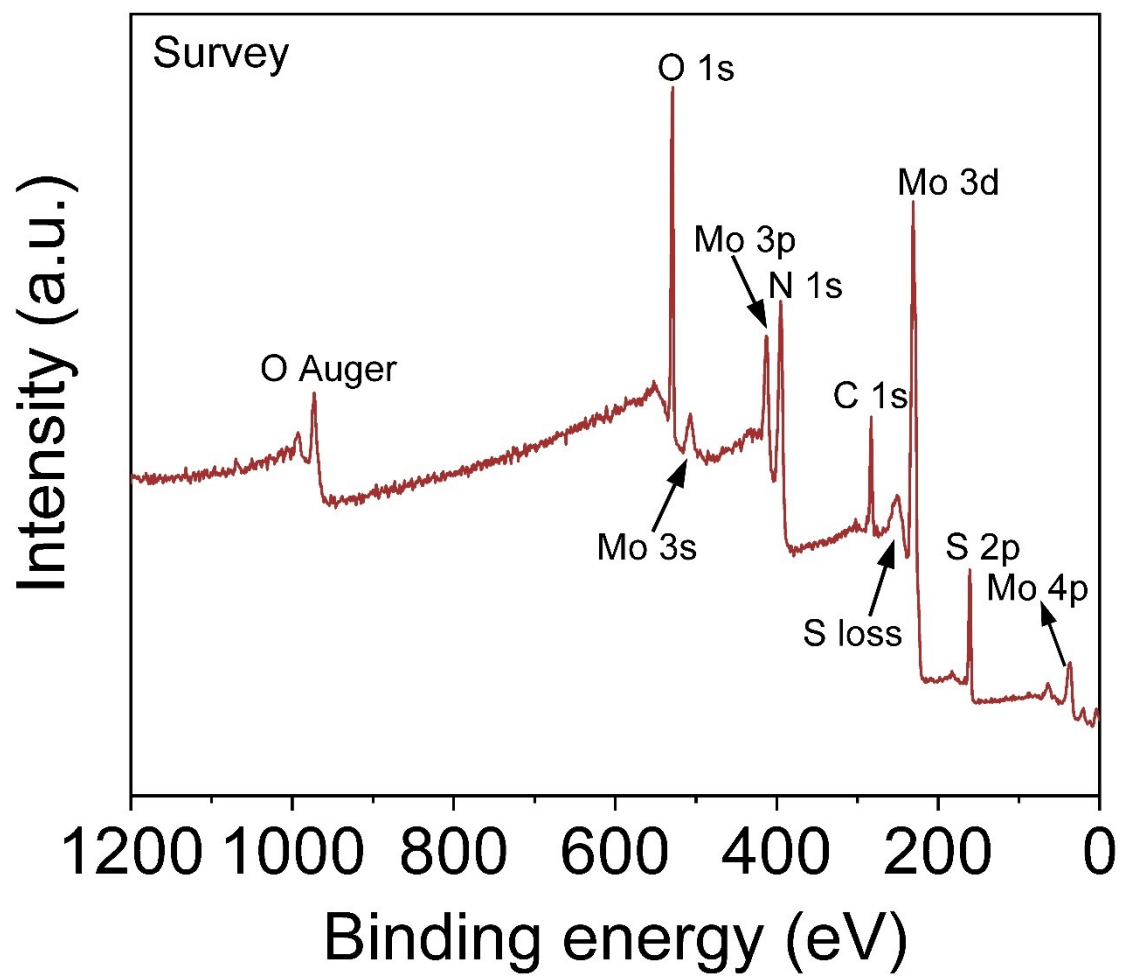

**Figure S4.** XPS survey spectrum of Exp-MoS<sub>2</sub>.

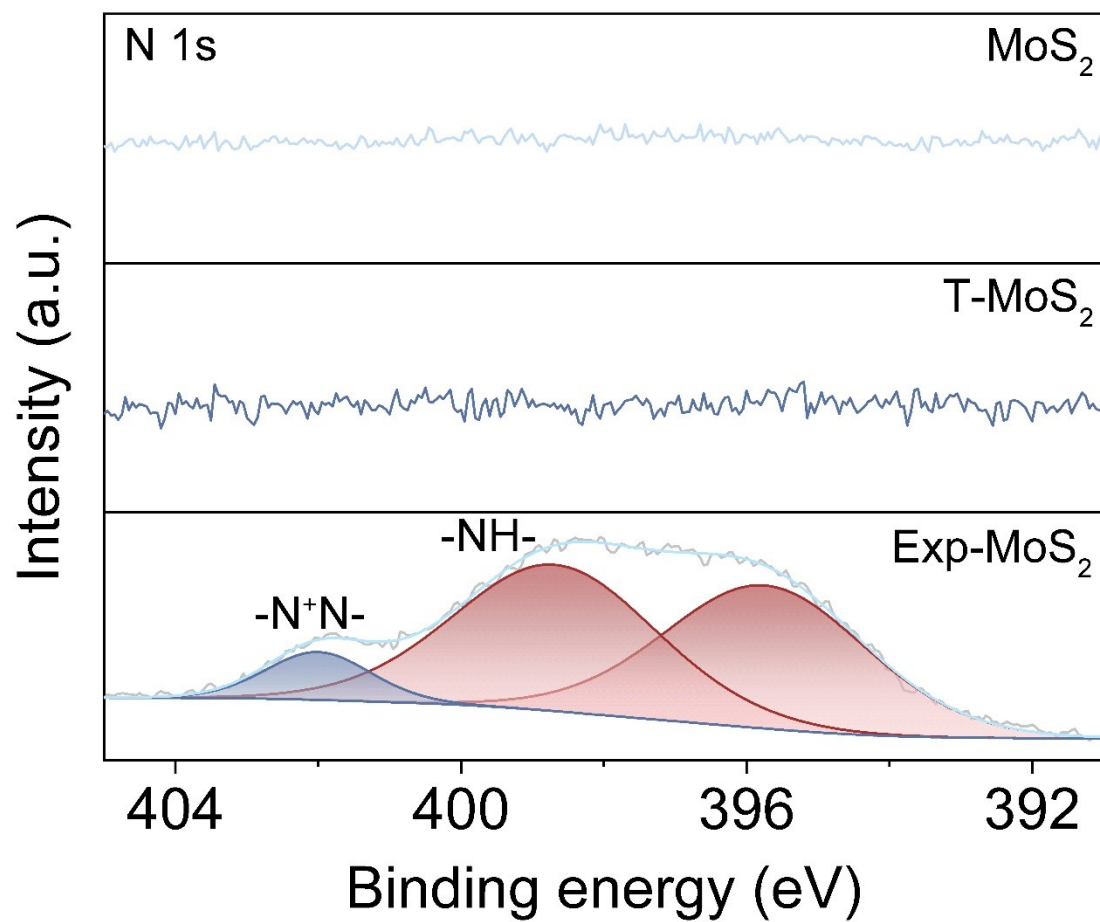

**Figure S5.** XPS spectra of MoS<sub>2</sub>, T-MoS<sub>2</sub>, and Exp-MoS<sub>2</sub> in N 1s region.

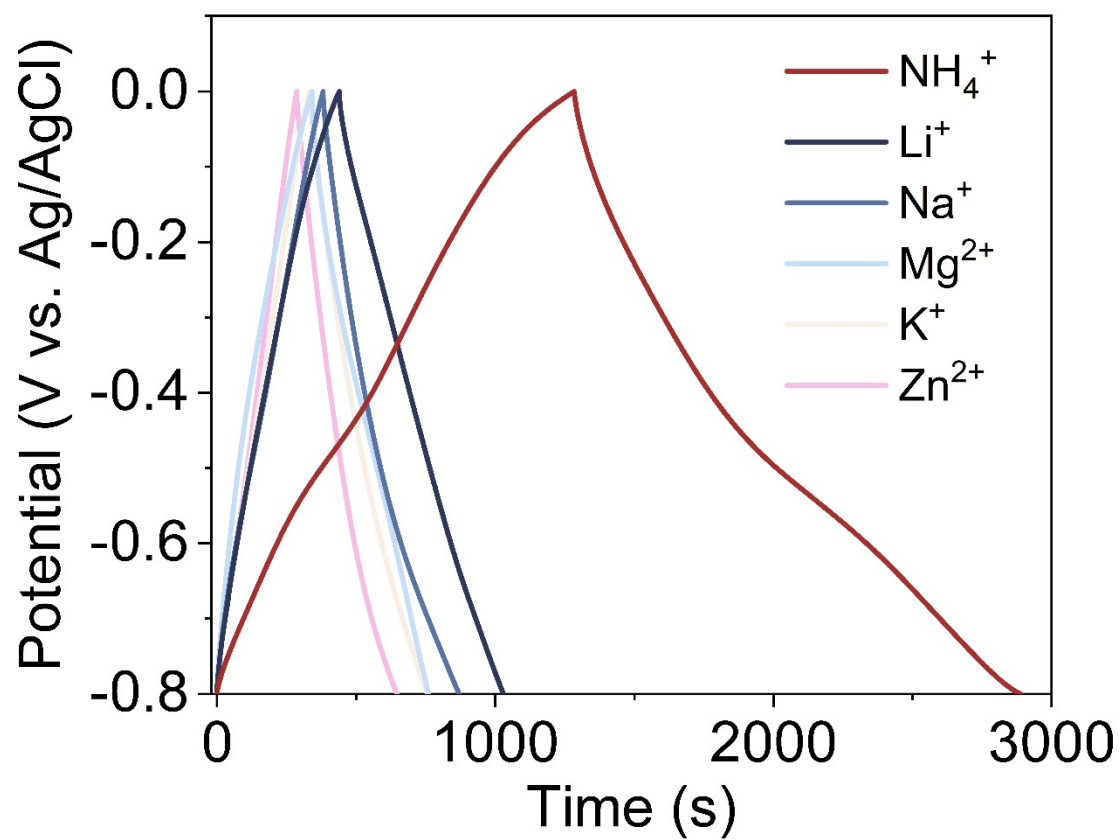

**Figure S6.** GCD curves of Exp-MoS<sub>2</sub>/CC in different electrolytes at 1 mA cm<sup>-2</sup>.

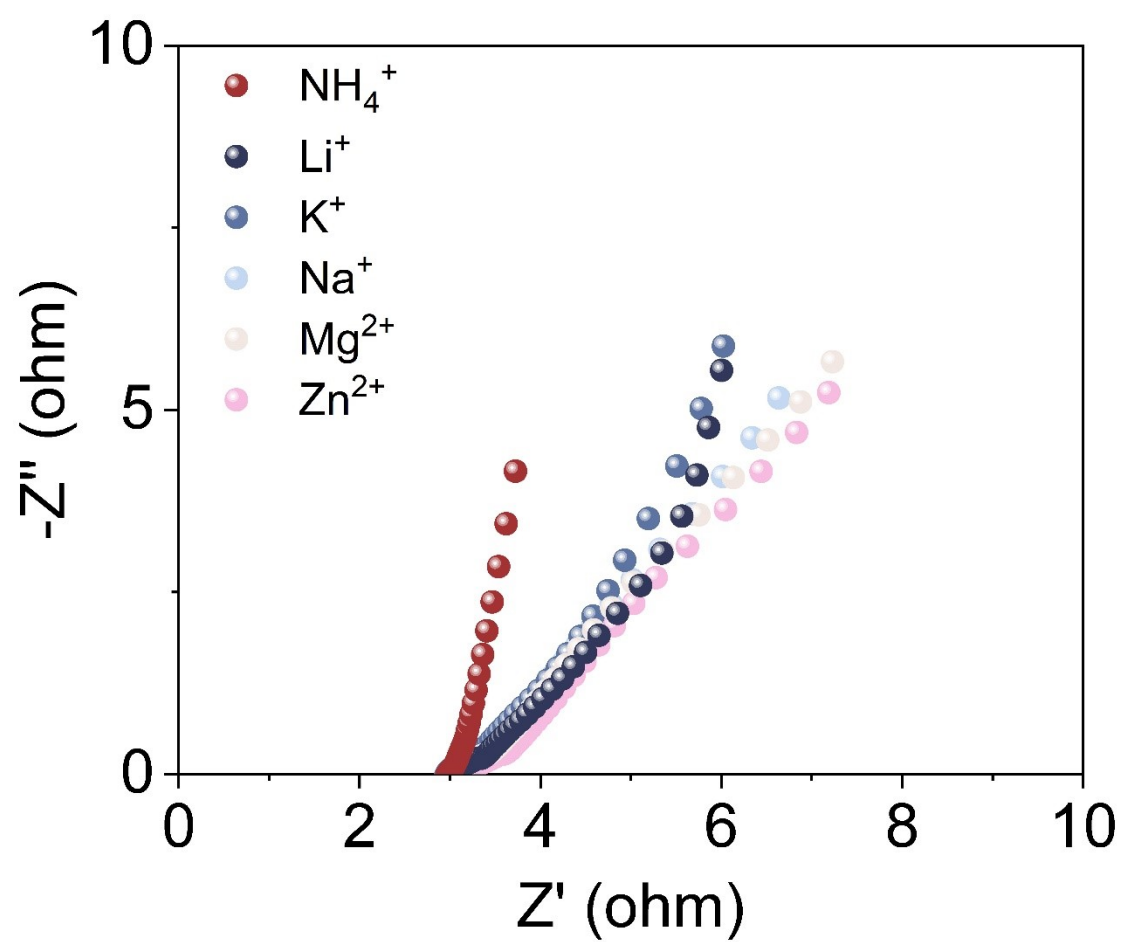

**Figure S7.** Nyquist plots of Exp-MoS<sub>2</sub>/CC in different cation electrolytes.

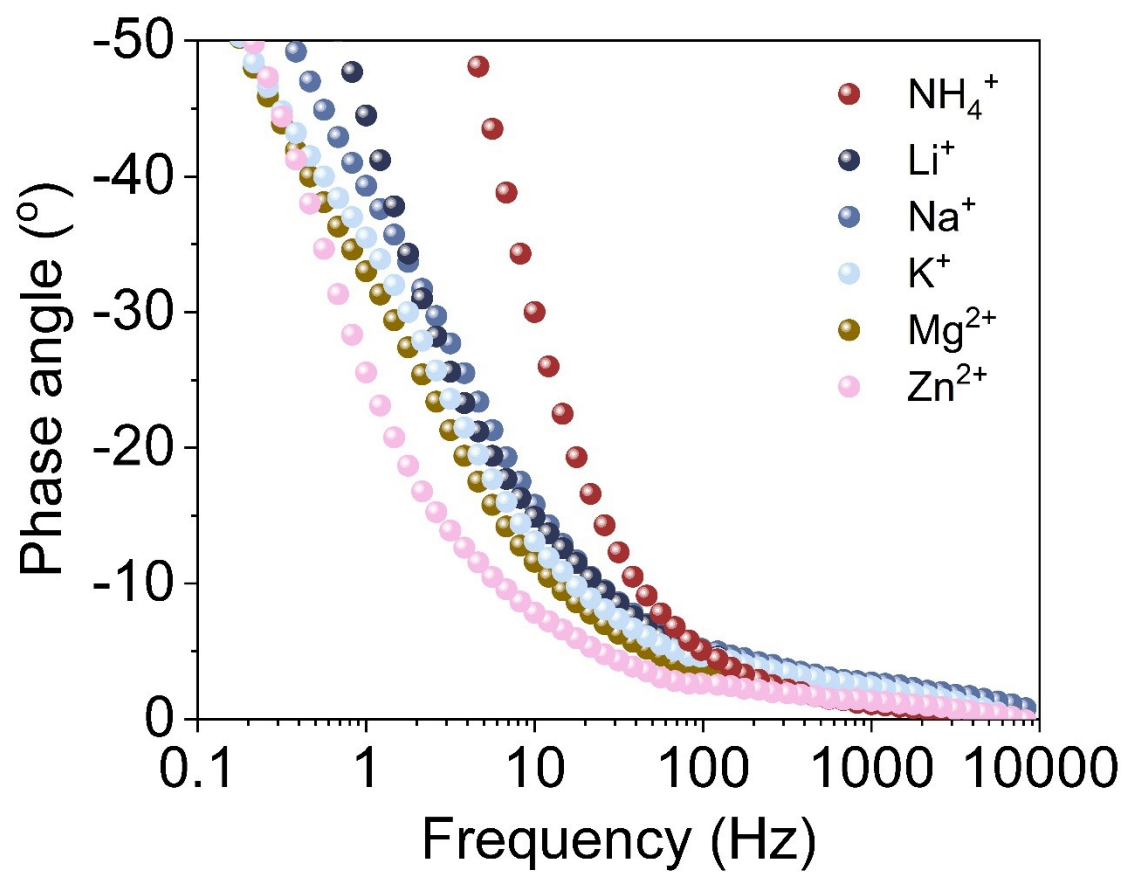

**Figure S8.** The phase angle vs. frequency plots of Exp-MoS<sub>2</sub>/CC in different cation electrolytes.

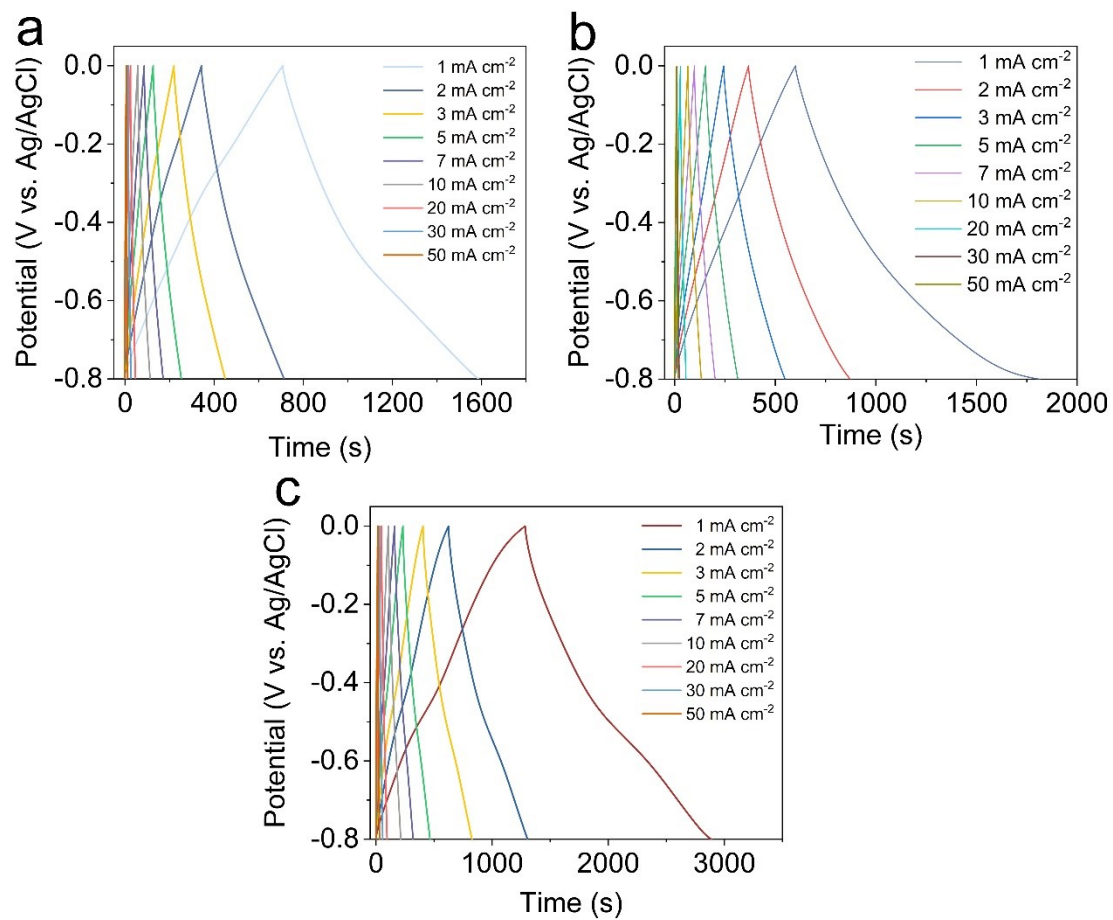

**Figure S9.** GCD curves of (a) MoS<sub>2</sub>/CC, (b) T-MoS<sub>2</sub>/CC, and (c) Exp-MoS<sub>2</sub>/CC at a range of 1–50 mA cm<sup>-2</sup>.

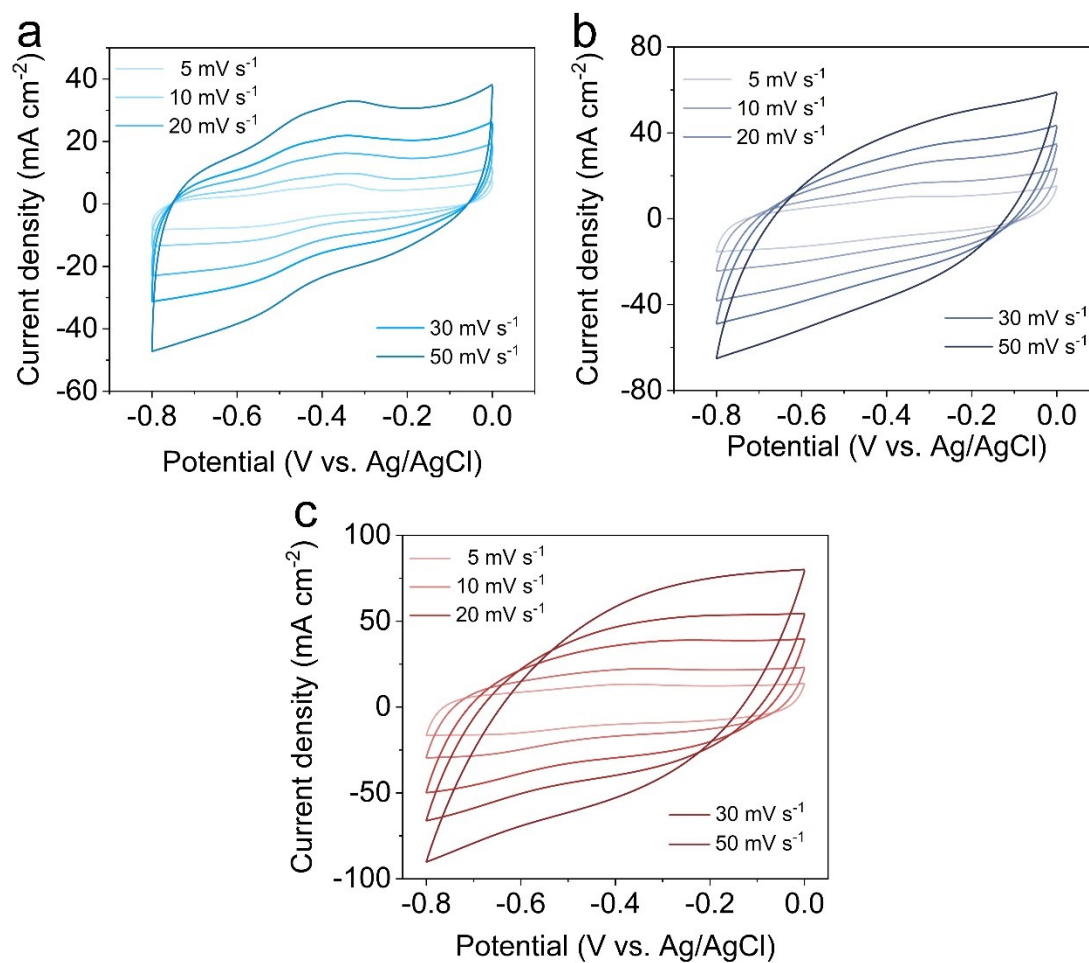

**Figure S10.** CV curves of (a) MoS<sub>2</sub>/CC, (b) T-MoS<sub>2</sub>/CC, and (c) Exp-MoS<sub>2</sub>/CC at a range of 5–50 mV s<sup>-1</sup>.

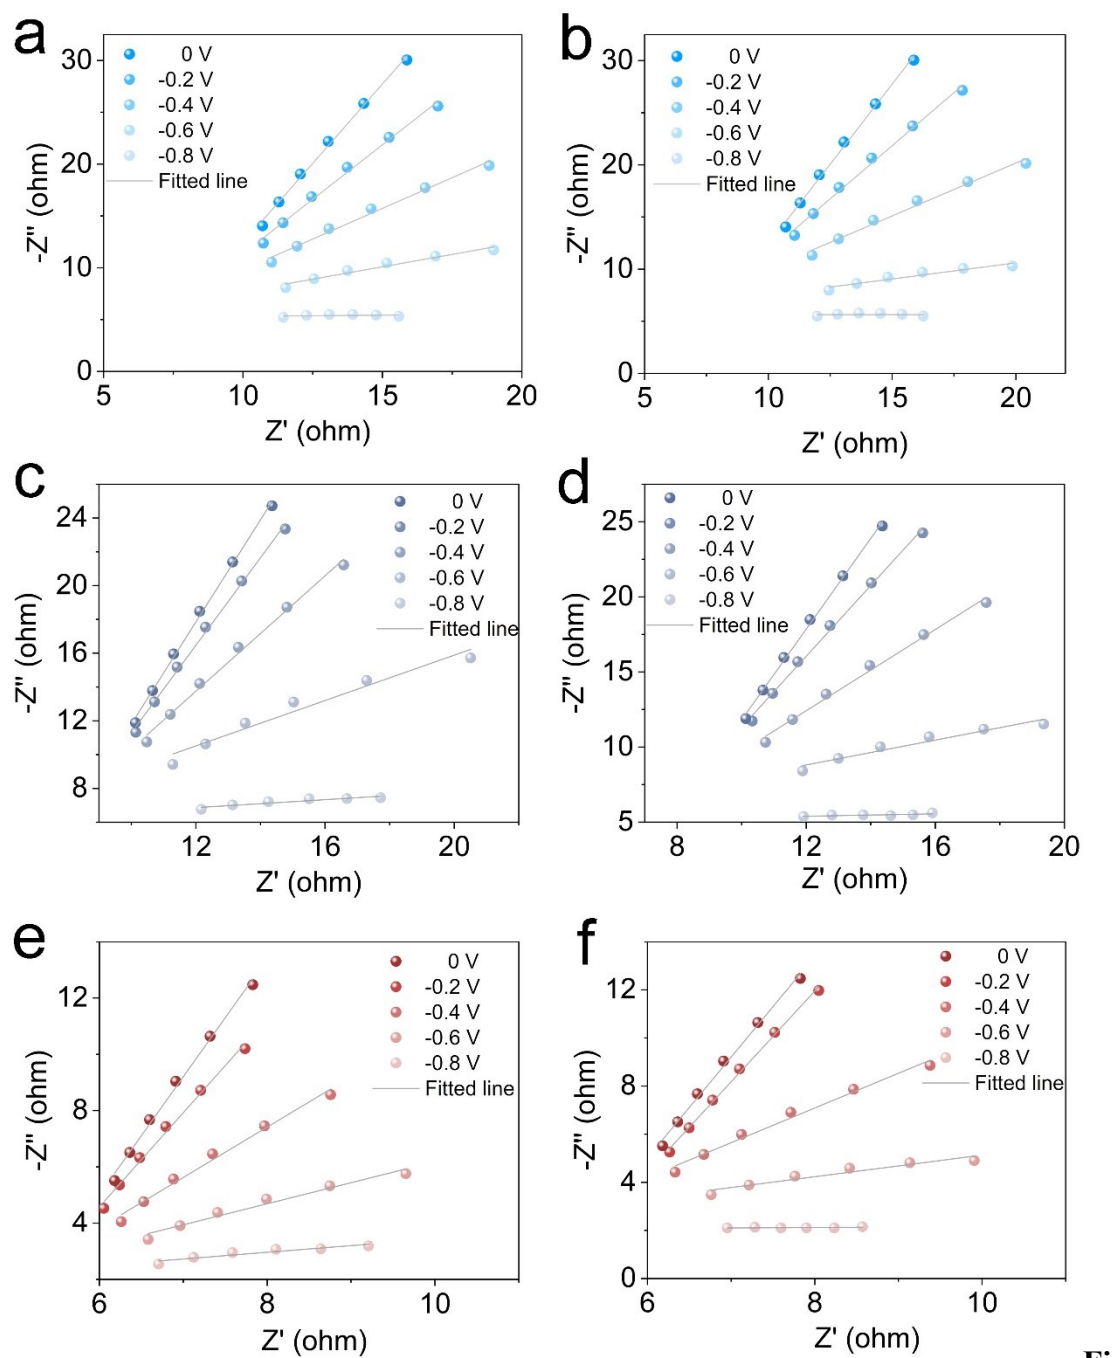

**Fi**

**Figure S11.** Fitted Warburg impedance at the low frequency for (a, b) MoS<sub>2</sub>/CC, (c, d) T-MoS<sub>2</sub>/CC, and (e, f) Exp-MoS<sub>2</sub>/CC during GCD process.

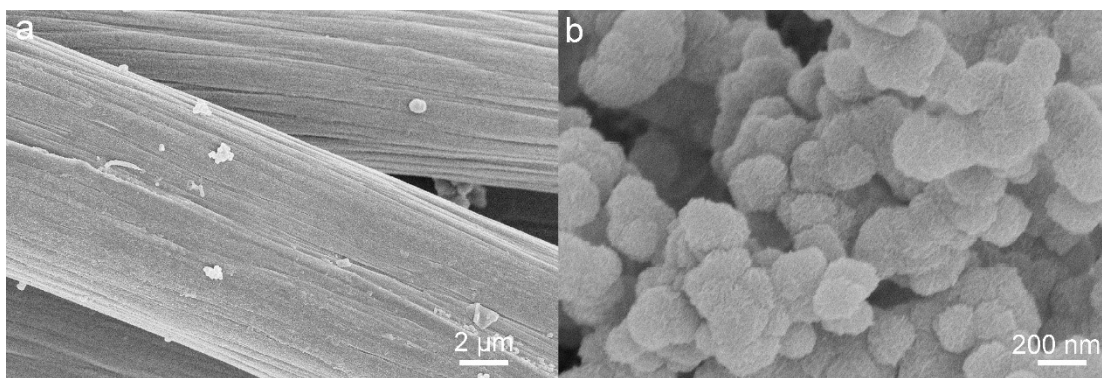

**Figure S12.** (a) Low- and (b) high-magnification SEM images of MnO<sub>2</sub>/CC.

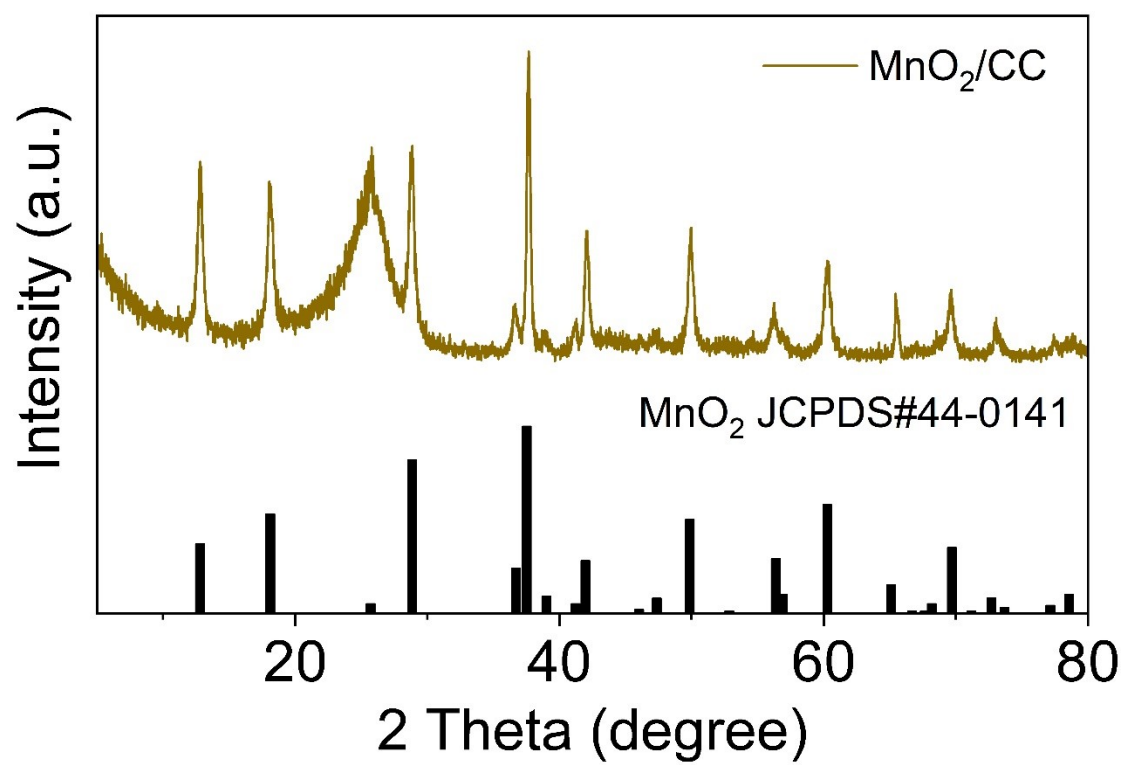

**Figure S13.** XRD pattern of MnO<sub>2</sub>/CC.

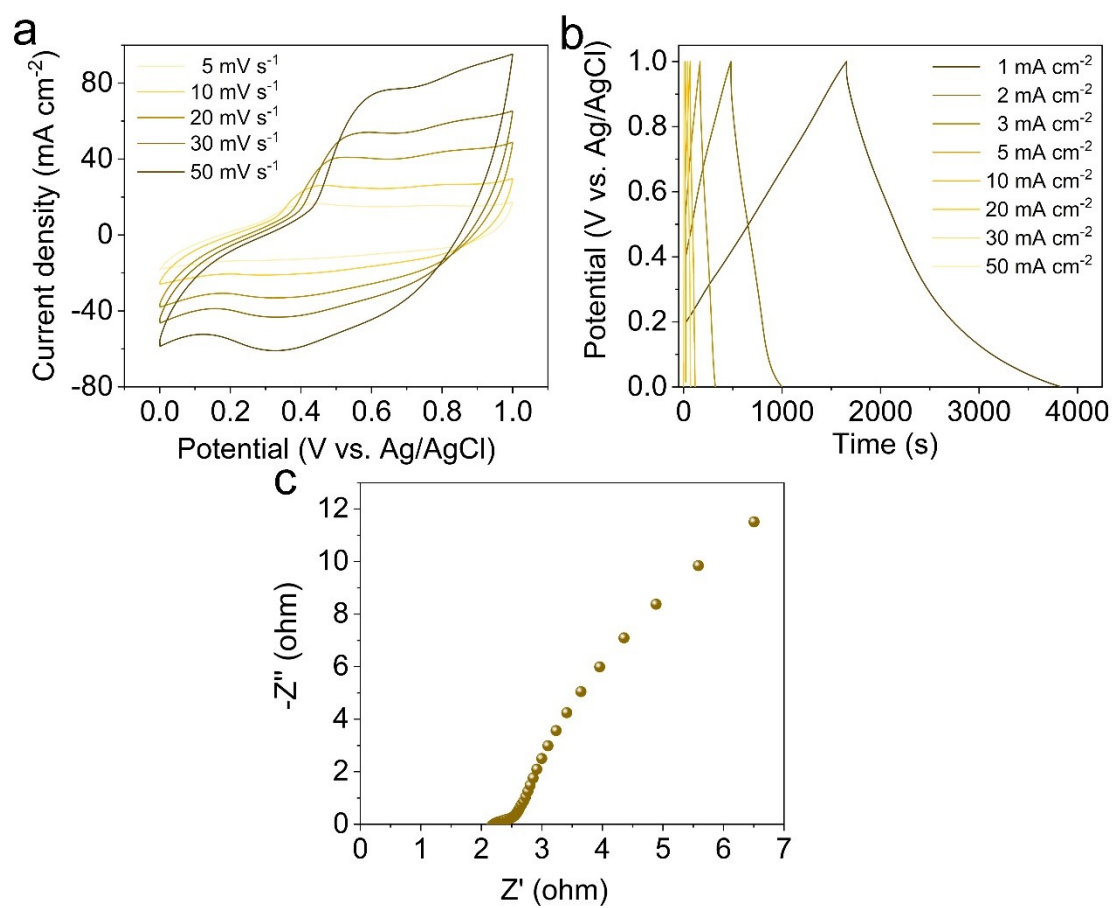

**Figure S14.** (a) CV curves, (b) GCD curves, and (c) Nyquist plots of MnO<sub>2</sub>/CC.

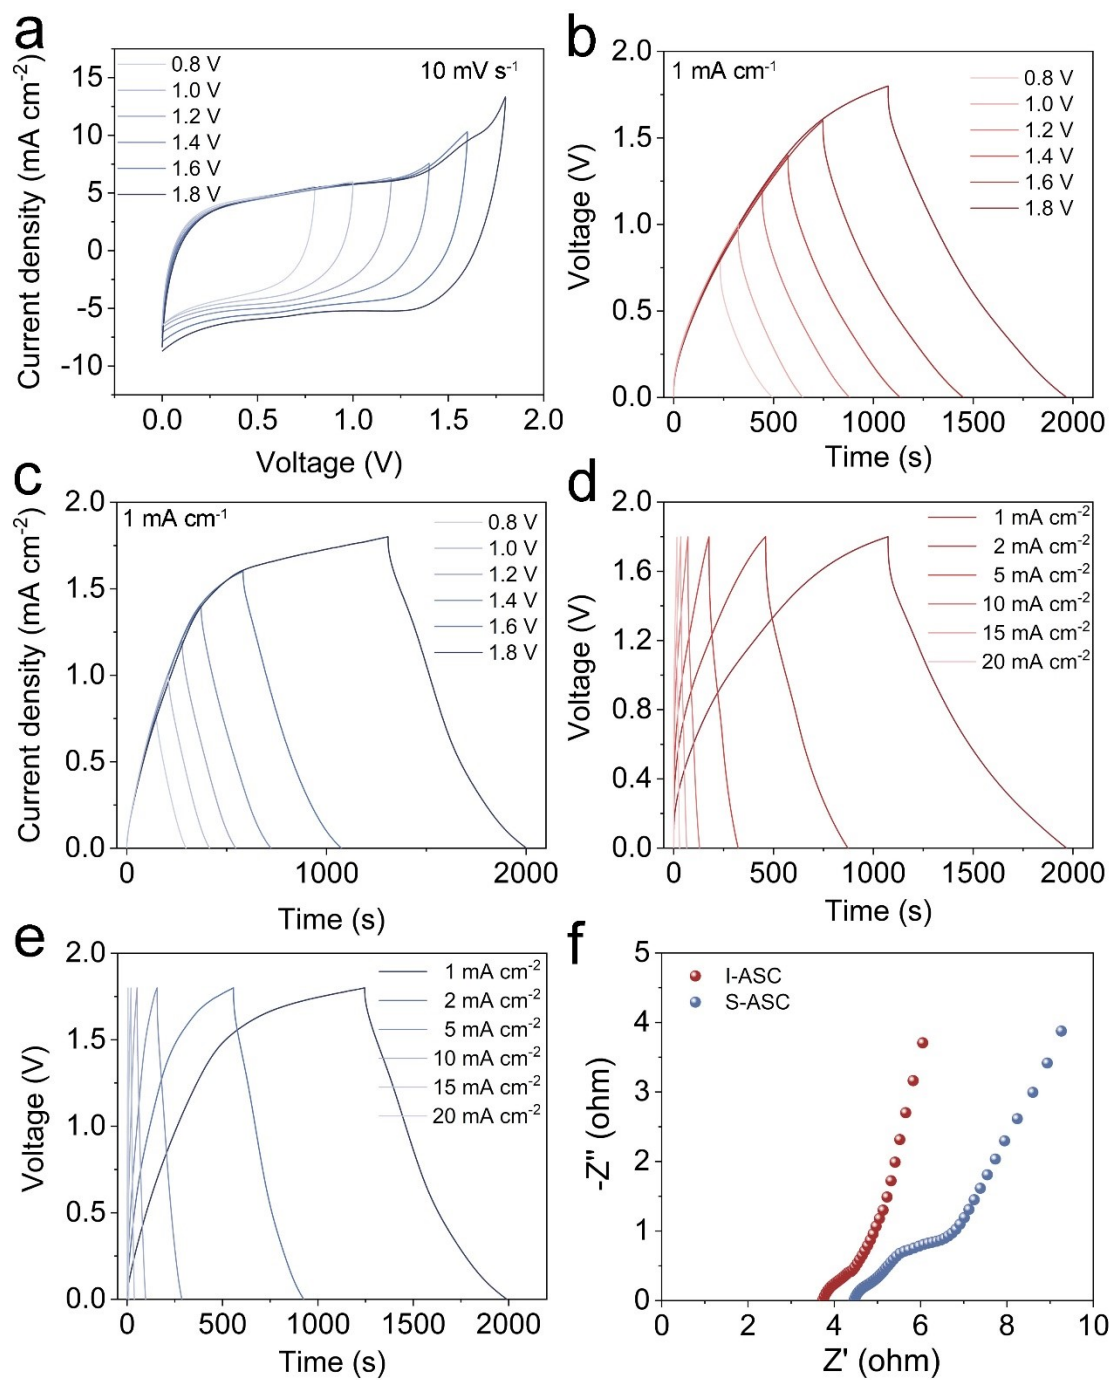

**Figure S15.** (a) CV curves of S-ASC at various potential windows. GCD curves of (b) I-ASC and (c) S-ASC at various potential windows. GCD curves of (d) I-ASC and (e) S-ASC at various current densities. (f) Nyquist plots of I-ASC and S-ASC.

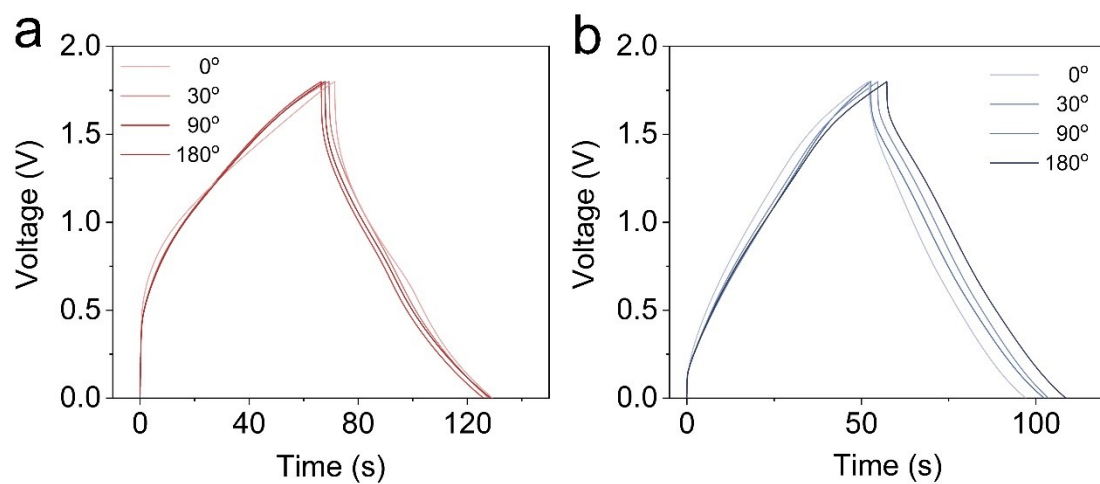

**Figure S16.** GCD curves of (a) I-ASC and (b) S-ASC at various bending states.

**Table S1.** Comparison of electrochemical performance of the I-ASC and S-ASC with previously reported energy storage devices.

| Device                                                                                                 | Electrolyte                                         | Energy density (mWh cm <sup>-2</sup> ) | Power density (mW cm <sup>-2</sup> ) | Ref.             |
|--------------------------------------------------------------------------------------------------------|-----------------------------------------------------|----------------------------------------|--------------------------------------|------------------|
| <b>I-ASC</b>                                                                                           | <b>PVA/NH<sub>4</sub>Cl</b>                         | <b>223.7</b>                           | <b>900.1</b>                         | <b>This work</b> |
| <b>S-ASC</b>                                                                                           | <b>PVA/NH<sub>4</sub>Cl</b>                         | <b>186.5</b>                           | <b>899.6</b>                         |                  |
| δ-MnO <sub>2</sub> //ACC                                                                               | 1 M (NH <sub>4</sub> ) <sub>2</sub> SO <sub>4</sub> | 0.86                                   | 20                                   | 3                |
| α-MnO <sub>2</sub> /(NH <sub>4</sub> ) <sub>x</sub> WO <sub>3</sub>                                    | 2 M NH <sub>4</sub> Ac                              | 1.01                                   | 18                                   | 4                |
| MnO <sub>2</sub> /CNTF//MoS <sub>2</sub> @TiN/CNTF                                                     | PVA/NH <sub>4</sub> Cl                              | 0.195                                  | 1.1                                  | 5                |
| ACC@VPP/PTCDI                                                                                          | PVA/NH <sub>4</sub> Cl                              | 0.32                                   | 0.09                                 | 6                |
| Cu-HHB/I <sub>2</sub> //P-MXene                                                                        | 1 M (NH <sub>4</sub> ) <sub>2</sub> SO <sub>4</sub> | 31.5                                   | 400                                  | 7                |
| Ti <sub>3</sub> C <sub>2</sub> T <sub>x</sub> //Zn                                                     | PVA/ZnCl <sub>2</sub>                               | 20                                     | 0.5                                  | 8                |
| Ti <sub>3</sub> C <sub>2</sub> T <sub>x</sub> /CNF//Ti <sub>3</sub> C <sub>2</sub> T <sub>x</sub> /CNF | PVA/H <sub>2</sub> SO <sub>4</sub>                  | 0.1                                    | 0.299                                | 9                |
| AC/CNT/MXene-N/GO//AC/CNT/MXene-N/GO                                                                   | PVA/H <sub>2</sub> SO <sub>4</sub>                  | 0.42                                   | -                                    | 10               |
| MoS <sub>2</sub> //Na-MnO <sub>2</sub>                                                                 | Na <sub>2</sub> SO <sub>4</sub>                     | 178.4 μWh cm <sup>-2</sup>             | 1.1 μW cm <sup>-2</sup>              | 11               |
| Ti <sub>3</sub> C <sub>2</sub> T <sub>x</sub> //Ti <sub>3</sub> C <sub>2</sub> T <sub>x</sub>          | PVA/H <sub>2</sub> SO <sub>4</sub>                  | 1.64 μWh cm <sup>-2</sup>              | 0.7783 μW cm <sup>-2</sup>           | 12               |

## References

- 1 C. Meng, Y. Gao, Y. Zhou, K. Sun, Y. Wang, Y. Han, Q. Zhao, X. Chen, H. Hu and M. Wu, *Nano Res.*, 2023, **16**, 6228–6236.
- 2 Y. Li, C. Yu, Y. Gan, P. Jiang, J. Yu, Y. Ou, D.-F. Zou, C. Huang, J. Wang, T. Jia, Q. Luo, X.-F. Yu, H. Zhao, C.-F. Gao and J. Li, *npj Comput. Mater.*, 2018, **4**, 49.
- 3 Q. Chen, J. Jin, M. Song, X. Zhang, H. Li, J. Zhang, G. Hou, Y. Tang, L. Mai and L. Zhou, *Adv. Mater.*, 2022, **34**, 2107992.
- 4 Q. Chen, M. Song, X. Zhang, J. Zhang, G. Hou and Y. Tang, *J. Mater. Chem. A*, 2022, **10**, 15614–15622.
- 5 L. Han, J. Luo, R. Zhang, W. Gong, L. Chen, F. Liu, Y. Ling, Y. Dong, Z. Yong, Y. Zhang, L. Wei, X. Zhang, Q. Zhang and Q. Li, *ACS Nano*, 2022, **16**, 14951–14962.
- 6 X. Chen, P. Wang, Z. Feng, C. Meng and Y. Zhang, *Chem. Eng. J.*, 2022, **45**, 136747.
- 7 M. Gao, Z. Wang, Z. Liu, Y. Huang, F. Wang, M. Wang, S. Yang, J. Li, J. Liu, H. Qi, P. Zhang, X. Lu and X. Feng, *Adv. Mater.*, 2023, **35**, 2305575.
- 8 L. Li, W. Liu, K. Jiang, D. Chen, F. Qu and G. Shen, *Nano-Micro Lett.*, 2021, **13**, 100.
- 9 G. Zhou, M.-C. Li, C. Liu, Q. Wu and C. Mei, *Adv. Funct. Mater.*, 2022, **32**, 2109593.
- 10 L. Yu, Z. Fan, Y. Shao, Z. Tian, J. Sun and Z. Liu, *Adv. Energy Mater.*, 2019, **9**, 1901839.
- 11 Q. Zong, Q. Zhang, X. Mei, Q. Li, Z. Zhou, D. Li, M. Chen, F. Shi, J. Sun, Y. Yao and Z. Zhang, *ACS Appl. Mater. Interfaces*, 2018, **10**, 37233–37241.
- 12 S. Abdolhosseinzadeh, R. Schneider, A. Verma, J. Heier, F. Nüesch and C. Zhang, *Adv. Mater.*, 2020, **32**, 2000716.
